# Supplementary material
Source: Springer Nature journal article supplement (https://www.springermedizin.de/resource/supplementary/13031_2010_48_MOESM1_ESM.pdf/9645026)

# Surgical Procedures for 2008 in Masisi, DRC

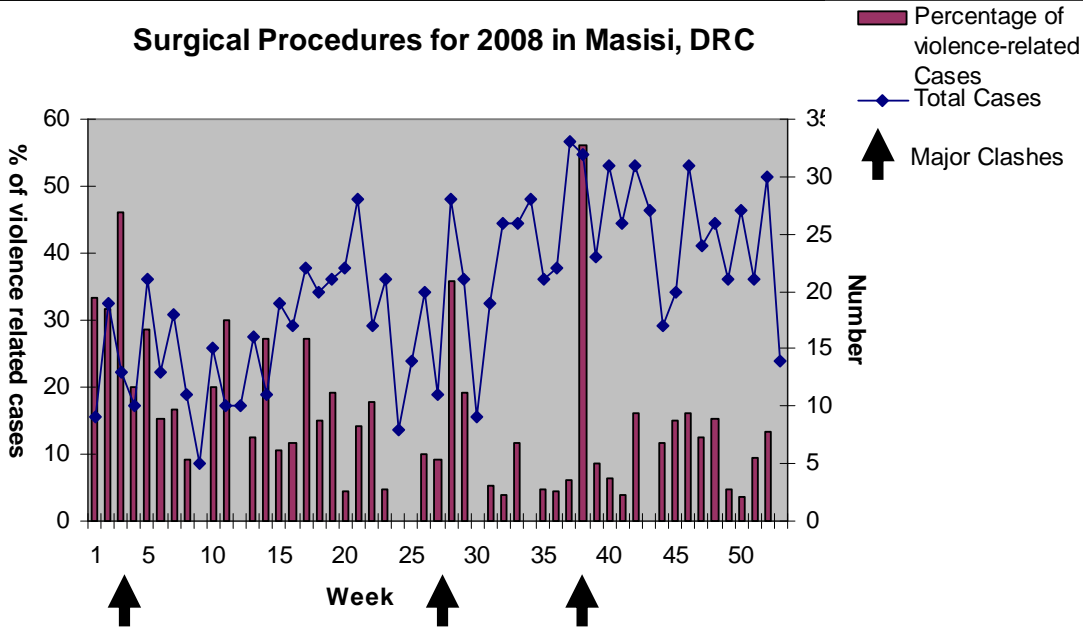

Supplement: MOESM1 [file 9645026]
